# Supplementary material for: Dysregulation of the Amniotic PPARγ Pathway by Phthalates: Modulation of the Anti-Inflammatory Activity of PPARγ in Human Fetal Membranes
Source: MDPI journal article supplement (doi:10.3390/life12040544), 2022-04-06
Supplement: s1 [file s1]

### **Supplementary Material**

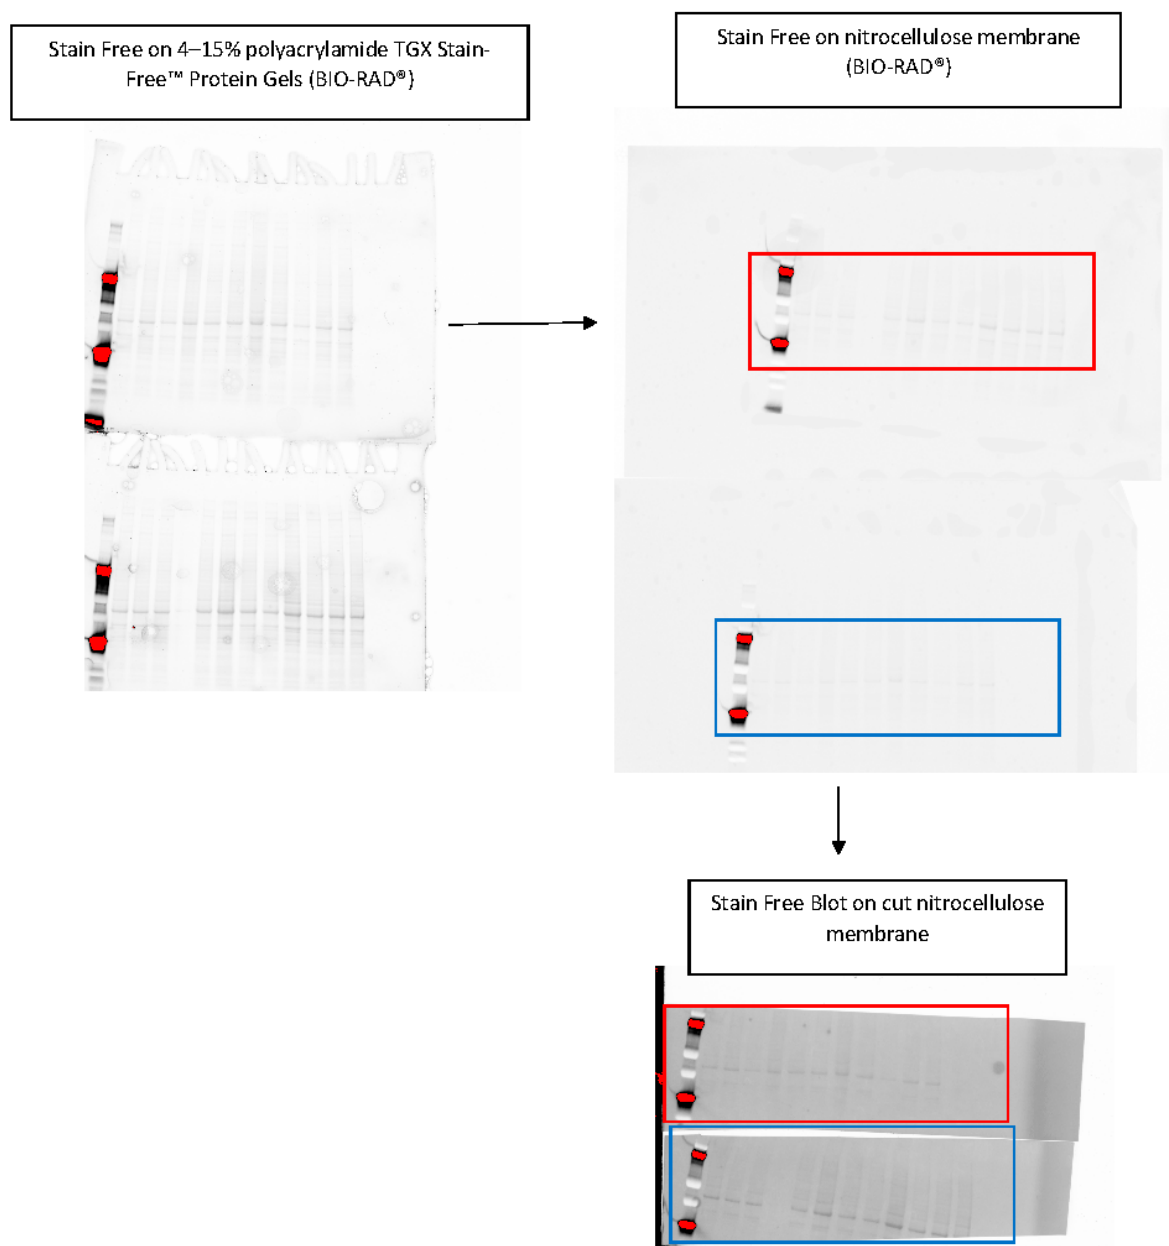

### **Supplemental figure 1. Western Blot assay steps**

After migration of the samples on the 4–15% polyacrylamide gel (BIO-RAD®), the total proteins are visualized by Stain Free gel with ChemiDoc™ Touch Imaging System (BIO-RAD®). After, the transfer of protein on a nitrocellulose membrane, a stain free blot is also realized. For antibody incubation, the membranes are cut in order to save reagents. The membrane peroxidase activity is assayed by enhanced chemiluminescence (Clarity Western ECL Substrate, BIO-RAD®). The relative intensities of the protein bands were analyzed using Image Lab software (BIO-RAD).

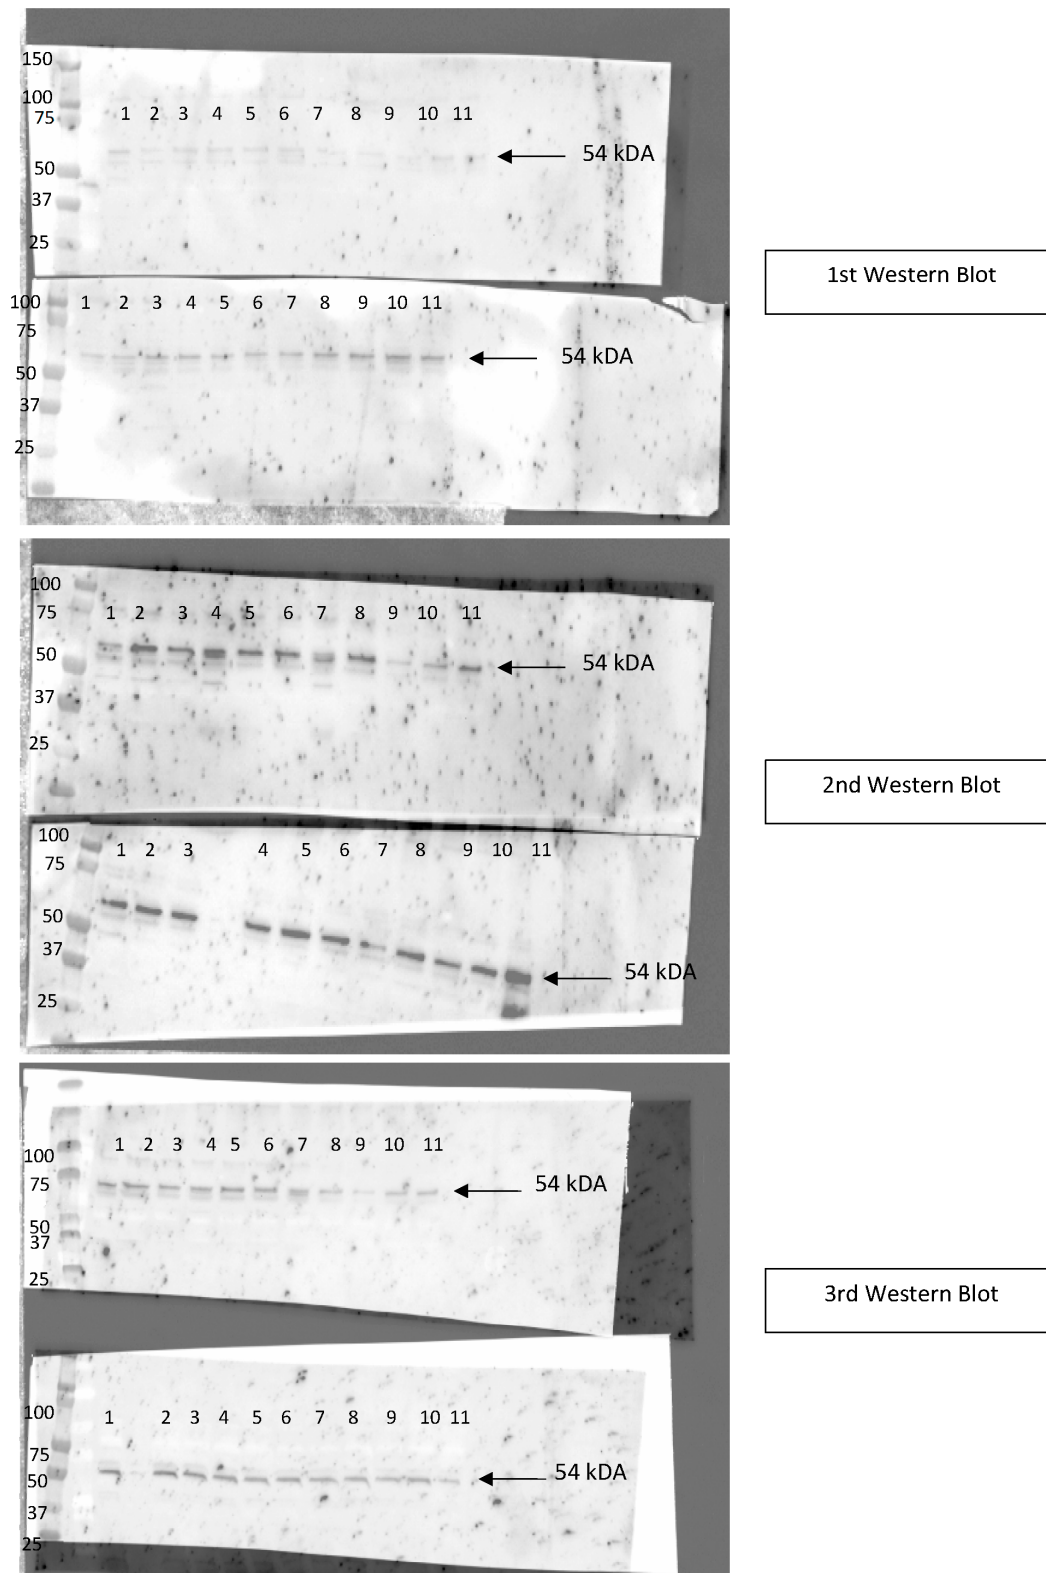

**Supplemental figure 2. Western Blot blots and values after integration**

For the three blots, upper membrane is for PPAR $\gamma$  protein expression after 24h of treatment; and lower membrane is PPAR $\gamma$  protein expression after 48h of treatment. The relative intensities of the protein bands were analyzed using Image Lab software (BIO-RAD®). The acquisition parameters are kept for all the experiments (high: 6814; low: 5980 and gamma: 1.02). KDa: kilo Daltons.

1: Untreated cells                      4: MEHP 10  $\mu$ M                      7: GW9662 1  $\mu$ M                      10: RGT 1  $\mu$ M + MEHP 10  $\mu$ M

2: DMSO                      5: MEHP 100  $\mu$ M                      8: RGT 1  $\mu$ M + GW9662 1  $\mu$ M                      11: RGT 1  $\mu$ M + MEHP 100  $\mu$ M

3: MEHP 1  $\mu$ M                      6: RGT 1  $\mu$ M                      9: RGT 1  $\mu$ M + MEHP 1  $\mu$ M

3: MEHP 1  $\mu$ M

| 24 | WB 1         |    |           | WB 2 |             | WB 3 |             |
|----|--------------|----|-----------|------|-------------|------|-------------|
|    | Condition    |    |           | lane | Norm.Volume | lane | Norm.Volume |
|    | NT           | 1  | 98773522  | 1    | 19932285    | 1    | 13457408    |
|    | DMSO         | 2  | 104449839 | 2    | 23303184    | 2    | 13070099    |
|    | MEHP 1       | 3  | 59835241  | 3    | 20975048    | 3    | 6006065     |
|    | MEHP 10      | 4  | 45710269  | 4    | 15548484    | 4    | 7007212     |
|    | MEHP 100     | 5  | 67277124  | 5    | 12178861    | 5    | 12393800    |
|    | AGO          | 6  | 91885551  | 6    | 16351535    | 6    | 9797608     |
|    | ANTA         | 7  | 165395725 | 7    | 11832028    | 7    | 8581231     |
|    | AGO+ANTA     | 8  | 135358704 | 8    | 14576570    | 8    | 5282192     |
|    | AGO+MEHP 1   | 9  | 159460097 | 9    | 3778023     | 9    | 4736963     |
|    | AGO+MEHP 10  | 10 | 116661373 | 10   | 7204333     | 10   | 13000778    |
|    | AGO+MEHP 100 | 11 | 118514447 | 11   | 9000152     | 11   | 10892603    |

| 48 | WB 1         |      |             | WB 2 |             | WB 3 |             |
|----|--------------|------|-------------|------|-------------|------|-------------|
|    | Condition    | lane | Norm.Volume | lane | Norm.Volume | lane | Norm.Volume |
|    | NT           | 1    | 18103864    | 1    | 18061450    | 1    | 18821184    |
|    | DMSO         | 2    | 19212332    | 2    | 18358640    | 2    | 20553246    |
|    | MEHP 1       | 3    | 21109085    | 3    | 18879151    | 3    | 17210796    |
|    | MEHP 10      | 4    | 33796485    | 4    | 22609948    | 4    | 14164194    |
|    | MEHP 100     | 5    | 40534335    | 5    | 18833188    | 5    | 9170218     |
|    | AGO          | 6    | 60677987    | 6    | 19543069    | 6    | 9691924     |
|    | ANTA         | 7    | 22499863    | 7    | 11491773    | 7    | 6812266     |
|    | AGO+ANTA     | 8    | 42856148    | 8    | 11204746    | 8    | 8634820     |
|    | AGO+MEHP 1   | 9    | 41015663    | 9    | 13662499    | 9    | 11131226    |
|    | AGO+MEHP 10  | 10   | 39663409    | 10   | 18017086    | 10   | 9825186     |
|    | AGO+MEHP 100 | 11   | 21868873    | 11   | 22535532    | 11   | 4770386     |
